# Supplementary material for: JMJD3 suppresses tumor progression in oral tongue squamous cell carcinoma patients receiving surgical resection
Source: PeerJ journal article supplement (doi:10.7717/peerj.13759), 2022-07-13

## Cell Line DNA Typing Report

Case Number: CID20200042

Report Date: 07/08/2020

## Genelabs Life Science Corp.

12F.-6, No.3, Yuanqu St.,  
Nangang Dist.,  
Taipei City 115, Taiwan  
TEL: +886-2-26557678  
FAX: +886-2-26557572  
E-mail: cellid@genelabs.com.tw

**Sample Information:**

- Applicant Name: 邱泰然 Tai-Jan Chiu
- Institution: 高雄長庚紀念醫院血液腫瘤科 Department of Hematology-Oncology, Kaohsiung Chang Gung Memorial Hospital
- Sample Description: **SAS**
- Sample type: Cell Pellet
- Sample Received Date: **07/02/2020**

**Test Description:**

DNA of the sample is extracted by Roche MagNA Pure Compact System.

DNA conc. = 143.3 ng/μl; OD260/280 = 2.00; OD260/230 = 2.26

The STR loci are amplified by Promega GenePrint® 24 System.

The CE analysis is performed on ABI PRISM 3730 GENETIC ANALYZER.

The raw data is analyzed by GeneMapper® Software V3.7.

The STR analysis is operated and reported by Mission Biotech.

This report is issued by:

*Zhang Kuo-Chang*

Laboratory Director

*James Chung*

General Manager

**STR Analysis Result:**

| ANSI/ATCC ASN-0002 STR Loci | Repeat Numbers | Extended STR Loci | Repeat Numbers | Extended STR Loci | Repeat Numbers |
|-----------------------------|----------------|-------------------|----------------|-------------------|----------------|
| D5S818                      | 9,9            | D3S1358           | 16,17          | DYS391*           | N/A            |
| D13S317                     | 10,12          | D1S1656           | 11,15          | D8S1179           | 11,13          |
| D7S820                      | 11,12          | D2S441            | 11,11          | D12S391           | 18,18          |
| D16S539                     | 12,13          | D10S1248          | 14,14          | D19S433           | 14,14.2        |
| vWA                         | 14,17          | Penta E           | 5,20           | FGA               | 24,24          |
| TH01                        | 6,7            | D18S51            | 15,15          | D22S1045          | 16,16          |
| Amelogenin                  | X              | D2S1338           | 20,24          |                   |                |
| TPOX                        | 11,12          | Penta D           | 10,13          |                   |                |
| CSF1PO                      | 11,11          | D21S11            | 30,30          |                   |                |

Case Number: CID20200042

Test Date: 07/06/2020

## Allele Report

Case Number: CID20200042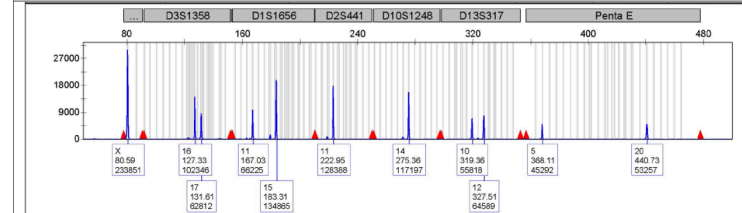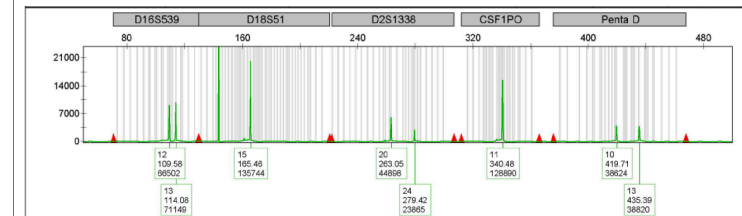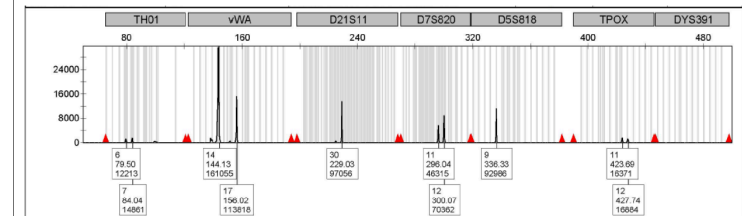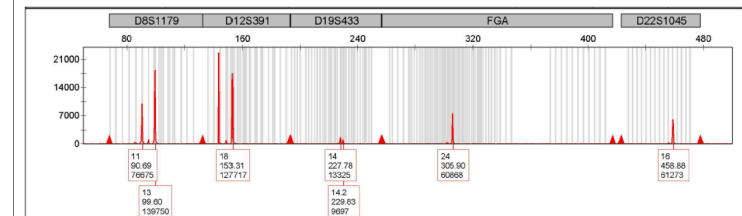

# Cell Line DNA Typing Report

Case Number: CID20200040  
Report Date: 07/08/2020

**Genelabs Life Science Corp.**  
12F-6, No.3, Yuanqu St.,  
Nangang Dist.,  
Taipei City 115, Taiwan  
TEL: +886-2-26557678  
FAX: +886-2-26557572  
E-mail: cellid@genelabs.com.tw

## Sample Information:

- i. Applicant Name: 邱泰然 Tai-Jan Chiu
- ii. Institution: 高雄長庚紀念醫院血液腫瘤科 Department of Hematology-Oncology, Kaohsiung Chang Gung Memorial Hospital
- iii. Sample Description: **CAL27**
- iv. Sample type: Cell Pellet
- v. Sample Received Date: **07/02/2020**

## Test Description:

DNA of the sample is extracted by Roche MagNA Pure Compact System.  
DNA conc. = 113.0 ng/μl; OD260/280 = 2.00; OD260/230 = 2.26  
The STR loci are amplified by Promega GenePrint® 24 System.  
The CE analysis is performed on ABI PRISM 3730 GENETIC ANALYZER.  
The raw data is analyzed by GeneMapper® Software V3.7.  
The STR analysis is operated and reported by Mission Biotech.  
This report is issued by:

*Zhang Kuei Chang*

Laboratory Director

*James Chung*

General Manager

## STR Analysis Result:

| ANSI/ATCC ASN-0002 STR Loci | Repeat Numbers | Extended STR Loci | Repeat Numbers | Extended STR Loci                                 | Repeat Numbers |
|-----------------------------|----------------|-------------------|----------------|---------------------------------------------------|----------------|
| D5S818                      | 11,12          | D3S1358           | 16,16          | DYS391*                                           | N/A            |
| D13S317                     | 10,11          | D1S1656           | 13,16          | D8S1179                                           | 13,15          |
| D7S820                      | 10,10          | D2S441            | 10,11.3        | D12S391                                           | 18.3,20        |
| D16S539                     | 11,12          | D10S1248          | 12,16          | D19S433                                           | 14,15.2        |
| vWA                         | 14,17          | Penta E           | 7,7            | FGA                                               | 25,25          |
| TH01                        | 6,9.3          | D18S51            | 13,13          | D22S1045                                          | 13,16          |
| Amelogenin                  | X              | D2S1338           | 23,24          | Case Number: CID20200040<br>Test Date: 07/06/2020 |                |
| TPOX                        | 8,8            | Penta D           | 9,10           |                                                   |                |
| CSF1PO                      | 10,12          | D21S11            | 28,29          |                                                   |                |

# Allele Report

Case Number: CID20200040

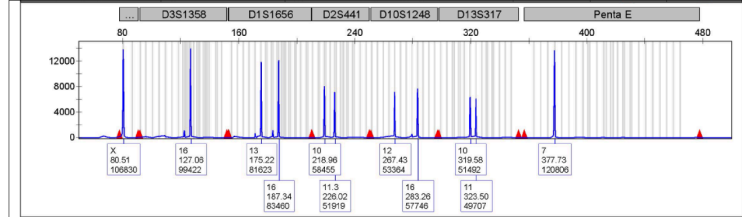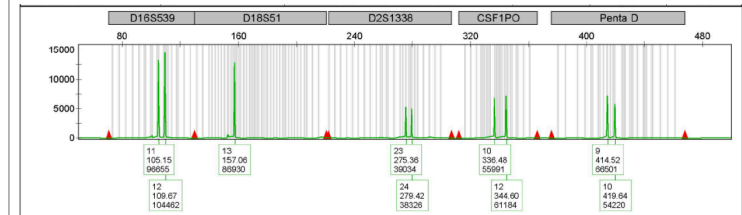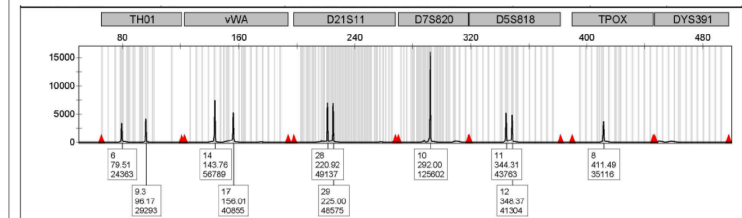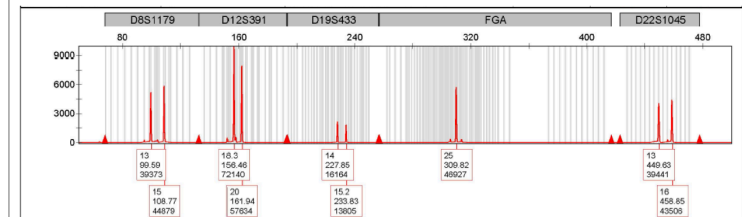

Supplement: Short_tandem_repeat_profiles_of_HNSCC_cell_lines.pdf [file Short_tandem_repeat_profiles_of_HNSCC_cell_lines.pdf]
