# Supplementary material for: JMJD3 suppresses tumor progression in oral tongue squamous cell carcinoma patients receiving surgical resection
Source: PeerJ journal article supplement (doi:10.7717/peerj.13759), 2022-07-13

2021.04.09

HNCC + GSK-J4 (JMJD3/UTX inhibitor)

GSK-J4 ( $\mu$ M)      SAS      Cal=7      JMJD3 (1=2000)

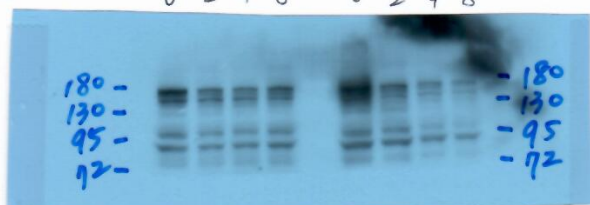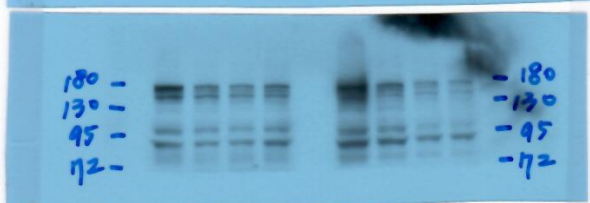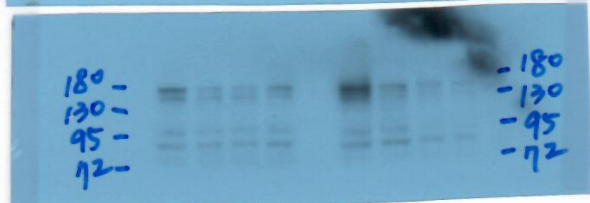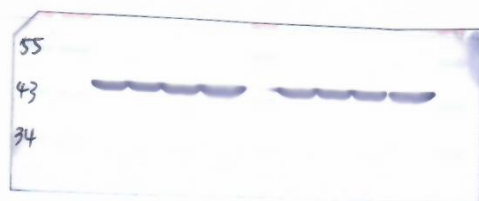

Actin

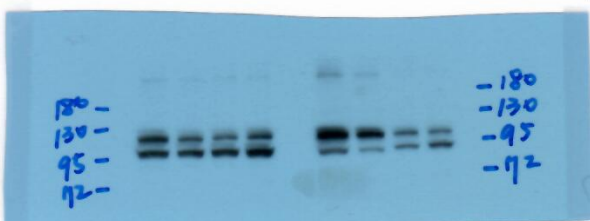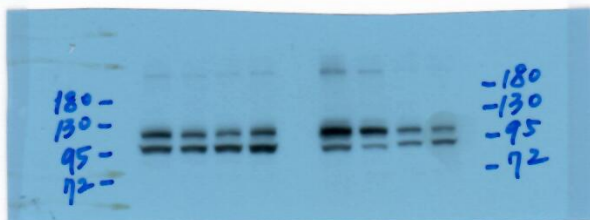

UTX (1=2000)

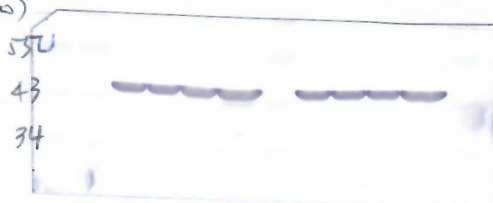

Actin

8% SDS-PAGE

lysate: 50  $\mu$ g

Running condition: 80-130V

Transfer condition: 90 min

Blocking: 5% skim-milk  
RT 1 hr

1 $^{\circ}$ Ab = 4 $^{\circ}$ C %N ~19 hr

1 $^{\circ}$ Ab wash: 90 rpm/15 min  $\times$  4

2 $^{\circ}$ Ab = 1 hr (RT)

2 $^{\circ}$ Ab wash: 90 rpm/10 min  $\times$  4

2020.08.28

HNCC + GSK-J4 (JMJD3/UTX Inhibitor)

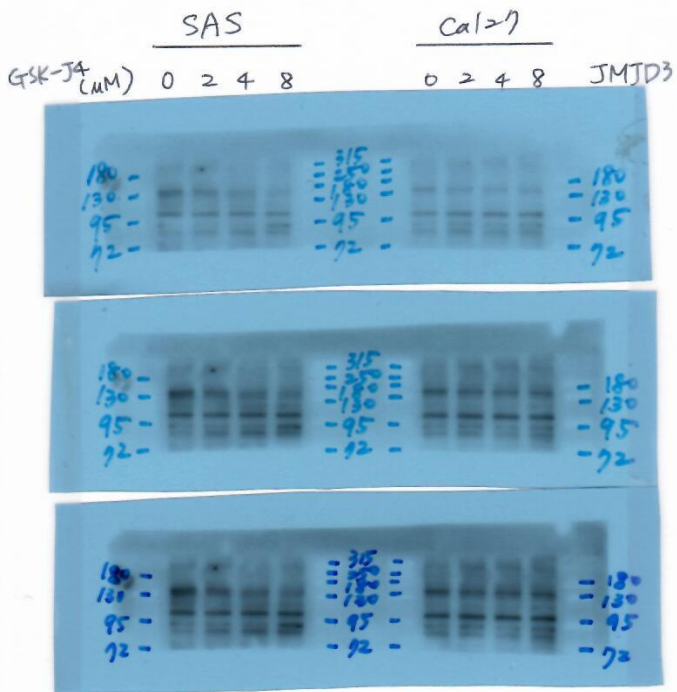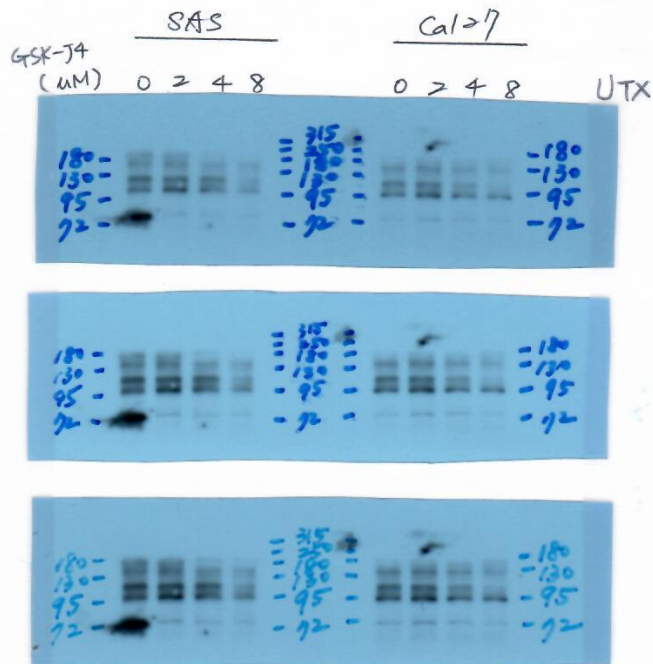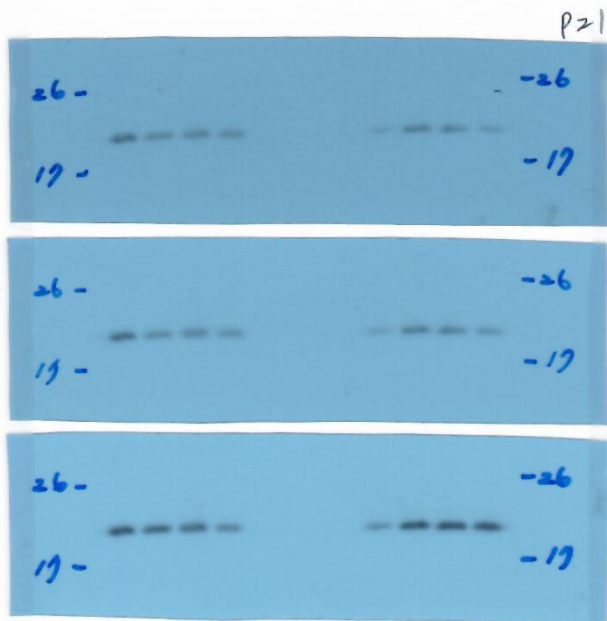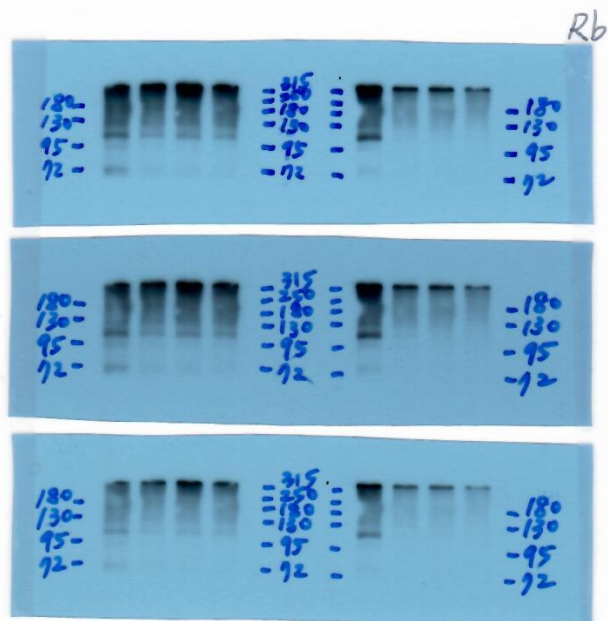

Supplement: Original_data.zip [file Original_data.zip]
