# Supplementary material for: JMJD3 suppresses tumor progression in oral tongue squamous cell carcinoma patients receiving surgical resection
Source: PeerJ. 2022 Jul 13;10:e13759. doi: 10.7717/peerj.13759 (PMC9288160; doi:10.7717/peerj.13759)
Supplement: Supplemental Information 1 [file peerj-10-13759-s001.xlsx]

## Sheet: 復原_工作表1
SEX (1:male; 2: female)	Alcohol (1: yes; 0: no)	Betal nut (1: yes; 0: no)	Smoking (1: yes; 0: no)	Age (years)	JMJD3 expression (1: high; 0: low)	Pathology T stage	Pathology N stage	Pathology stage	Grade	Vascular invasion (1: yes; 0: no)	Perineurial invasion(1: yes; 0: no)	Extranodal extension(1: yes; 0: no)	Surgical margin (1: involved;0: uninvolved)	Recurrence(1: yes; 0: no)	DFS (months)	Dead(1: dead; 0: alive)	OS (months)
1	1	1	1	30.5205	0	4a	0	4A	1	0	1	0	0	1	9.6	0	111.5
1	1	1	1	31.5671	1	2	0	2	1	0	0	0	0	0	93.5	0	93.5
1	1	1	1	33.3918	0	1	0	1	1	1	0	0	0	1	30.5	1	30.5
1	1	0	1	37.8685	1	1	0	1	2	0	0	0	0	0	62.7667	0	62.7667
1	1	1	0	38.0904	1	4a	0	4A	1	0	0	0	0	0	104.767	0	104.767
1	1	1	1	39.3644	0	2	0	2	2	0	0	0	0	1	6.9	1	14.7
1	1	0	1	39.7699	0	4a	0	4A	1	0	0	0	0	0	71.7	0	71.7
1	0	0	1	40.1918	0	1	0	1	1	0	0	0	0	0	102.667	0	102.667
1	0	0	0	40.6411	1	2	0	2	1	1	1	0	0	0	104.233	0	104.233
1	1	1	1	41.2027	1	1	0	1	2	0	0	0	0	0	80.8	0	80.8
1	1	1	1	41.2658	1	1	0	1	2	0	0	0	0	0	67.4667	0	67.4667
1	1	1	1	41.7205	0	3	0	3	1	0	0	0	0	1	6.93333	1	13.6667
1	1	1	1	42.3123	1	4a	0	4A	1	1	1	0	0	0	77.9	0	77.9
1	1	1	1	42.3616	0	3	0	3	1	0	0	0	0	0	78.1667	0	78.1667
1	1	1	1	42.7014	1	1	0	1	1	0	0	0	0	0	102.467	0	102.467
1	1	1	1	43.0027	1	1	0	1	1	0	0	0	0	0	87.0333	0	87.0333
1	1	0	1	43.2219	0	1	0	1	1	1	0	0	0	0	89.0333	0	89.0333
1	1	1	1	43.3589	0	3	0	3	1	0	0	0	0	0	112.133	0	112.133
1	1	1	1	43.4411	1	4a	0	4A	2	0	1	0	0	0	93.9333	0	93.9333
1	1	1	1	43.5288	1	4a	0	4A	1	0	0	0	0	1	87.8667	1	87.8667
1	1	1	1	43.9014	1	2	0	2	2	0	0	0	0	0	93.7667	0	93.7667
1	1	1	1	43.9397	1	1	0	1	2	0	0	0	0	1	23.2667	0	82.4667
2	0	0	0	44.5644	1	1	0	1	2	0	0	0	0	0	86.4	0	86.4
1	1	1	1	46.1671	0	4a	0	4A	1	0	0	0	0	1	38.8	1	38.8
1	1	1	1	47.6493	1	2	0	2	1	0	0	0	0	1	40.3333	1	40.3333
1	1	1	1	48.5288	1	4a	0	4A	1	0	0	0	0	0	89.6333	0	89.6333
2	1	1	1	49.0384	0	2	0	2	2	0	1	0	0	1	11.5	1	19.5667
1	1	0	1	49.1479	0	2	0	2	2	0	1	0	0	1	33	1	33
1	1	1	1	50.0384	0	4a	0	4A	1	0	1	0	0	1	6.9	1	12.7667
1	1	1	0	50.4164	0	4a	0	4A	2	1	1	0	0	1	5.56667	1	10.9667
2	0	0	0	50.5397	1	2	0	2	2	0	1	0	0	0	106.967	0	106.967
1	1	1	1	50.8712	1	2	0	2	1	0	0	0	0	1	1.86667	1	10.4
1	1	1	1	51.2192	0	1	0	1	2	0	0	0	0	0	90.6333	0	90.6333
1	1	1	1	52.0685	1	3	0	3	1	0	1	0	0	1	21.8333	1	21.8333
1	1	1	1	52.7753	1	4a	0	4A	1	0	1	0	0	0	81.3	0	81.3
1	0	1	1	53.3014	1	4a	0	4A	1	0	0	0	0	1	47.3	1	51.1
1	1	1	1	53.4055	1	1	0	1	1	0	0	0	0	0	110.967	0	110.967
1	1	1	1	53.4986	0	1	0	1	2	0	0	0	0	0	88.2	0	88.2
1	0	0	0	53.5534	1	2	0	2	1	0	1	0	0	0	79.6667	0	79.6667
1	1	1	1	54.074	1	1	0	1	1	0	0	0	0	0	81.4667	0	81.4667
2	0	0	0	54.4164	1	2	0	2	1	0	1	0	0	0	72.2	0	72.2
1	1	1	1	54.5014	1	1	0	1	2	0	0	0	0	0	76	0	76
1	1	1	1	54.6329	0	2	0	2	1	0	0	0	0	0	88.8333	0	88.8333
1	1	1	1	54.9863	0	1	0	1	2	0	0	0	0	1	5	1	15.4333
2	1	1	0	54.989	0	4a	0	4A	1	0	0	0	0	0	87.8333	0	87.8333
1	0	1	1	55.5041	0	3	0	3	1	1	0	0	0	0	65.7333	0	65.7333
1	1	0	1	55.589	1	2	0	2	1	0	0	0	0	0	100.033	0	100.033
1	1	1	1	55.674	1	2	0	2	1	0	0	0	0	0	67.7	0	67.7
1	1	0	1	56.4219	0	2	0	2	2	0	1	0	0	0	99.3667	0	99.3667
1	1	0	1	56.6411	1	2	0	2	1	0	1	0	0	0	62.4667	0	62.4667
1	1	1	1	57.2247	1	2	0	2	2	0	1	0	0	1	37.1	1	51.0667
1	1	1	0	57.3781	1	2	0	2	2	0	1	0	0	1	76.5333	1	76.5333
1	1	1	1	58.0877	0	1	0	1	1	0	1	0	0	1	64.4667	1	64.4667
1	0	0	1	58.5562	1	1	0	1	2	0	0	0	0	1	9.46667	1	26.2667
1	0	1	1	58.7315	0	2	0	2	1	0	1	0	0	1	40.2333	1	40.2333
1	1	1	1	59.3452	1	1	0	1	1	0	0	0	0	0	75.9667	0	75.9667
1	0	1	1	62.9671	1	2	0	2	2	0	1	0	0	1	30.9667	1	39.5667
1	1	1	0	64.6877	1	2	0	2	2	0	0	0	0	0	73.3	0	73.3
1	1	1	1	64.7726	0	2	0	2	2	0	0	0	0	1	5.03333	1	6.1
1	1	1	1	67.6877	1	1	0	1	2	0	0	0	0	1	52.6	1	52.6
1	0	1	1	67.7068	1	2	0	2	2	0	0	0	0	1	57.4333	1	57.4333
1	0	0	0	68.8055	1	2	0	2	1	0	0	0	0	0	104.3	0	104.3
1	0	0	0	68.8548	0	1	0	1	1	0	0	0	0	0	76.0667	0	76.0667
1	1	1	1	69.3671	0	4a	0	4A	3	0	0	0	0	1	4.63333	1	4.63333
1	1	1	1	74.1397	1	4a	0	4A	1	0	0	0	0	1	4.2	1	22.5
1	0	0	0	75.6603	1	1	0	1	1	0	0	0	0	0	69.0667	0	69.0667
1	1	1	1	76.9808	0	2	0	2	2	0	1	0	0	1	3.03333	1	3.03333
2	0	0	0	85.6493	1	1	0	1	2	0	0	0	0	0	73.2	0	73.2
1	0	0	0	85.9699	0	3	0	3	1	0	0	0	0	1	7.93333	1	7.93333
1	1	1	1	33.011	1	2	1	3	2	0	1	0	0	1	69.8	1	69.8
1	1	0	1	36.9945	0	2	1	3	1	1	1	0	0	0	87.9333	0	87.9333
1	1	1	1	40.8849	0	2	1	3	2	0	0	0	0	0	93.1333	0	93.1333
1	1	1	1	41.0164	1	2	1	3	1	0	1	0	0	0	102.633	0	102.633
1	1	1	1	41.189	0	1	1	3	1	0	0	0	0	0	60.7333	0	60.7333
1	1	1	1	42	1	3	1	3	1	1	0	0	0	1	23	1	23
1	1	1	0	42.6822	0	4b	1	4B	1	0	0	0	0	1	7.26667	1	7.26667
1	1	1	1	44.8082	0	2	1	3	1	0	0	0	0	0	76	0	76
1	1	1	1	45.8356	1	1	1	3	1	1	0	0	0	1	6.73333	1	6.73333
1	1	0	1	45.9589	0	4a	1	4A	2	0	1	1	0	1	2.63333	1	2.63333
1	1	1	1	46.1452	0	4a	1	4A	1	0	1	0	0	1	50.2	1	57.5667
1	1	1	1	48.0137	0	4a	1	4A	1	0	0	0	0	0	103.4	0	103.4
2	0	0	0	50.8767	1	4a	1	4A	2	1	1	0	0	1	11.4333	1	11.4333
1	1	1	1	53.4849	1	2	1	3	1	0	1	0	0	1	29.8667	0	89.7333
2	1	1	0	53.6849	0	2	1	3	2	0	1	0	0	0	104.5	0	104.5
1	1	1	1	55.1288	0	1	1	3	1	0	0	1	0	1	77.4667	1	77.4667
2	0	0	0	55.3836	0	1	1	3	2	0	1	0	0	1	8.2	0	110.633
2	1	0	1	56.5041	0	1	1	3	1	0	0	1	0	1	19.9333	1	28.6
1	0	1	0	60.3534	0	1	1	3	2	0	0	0	0	0	78.9333	0	78.9333
1	1	1	1	61.7068	0	2	1	3	1	0	0	0	0	1	1.96667	1	10.3667
1	0	0	0	65.1863	0	1	1	3	2	0	1	1	0	1	36.7333	0	90.2667
1	1	0	0	71.3479	0	2	1	3	2	0	1	0	0	1	13.3667	1	13.3667
1	1	1	1	75.2411	0	4a	1	4A	2	0	0	0	0	1	12.0667	1	12.0667
1	1	1	1	79.3726	0	3	1	4A	1	0	0	0	0	1	4.56667	1	9.6
1	1	1	1	30.3123	0	4a	2	4A	1	0	0	0	0	1	8.53333	1	8.53333
1	1	1	1	34.8301	1	3	2	4A	2	0	0	1	0	0	74.8	0	74.8
1	0	1	1	56.3205	1	3	2	4A	1	0	0	1	0	1	68.4	1	68.4
1	1	1	1	74.4329	0	2	2	3	1	0	1	1	0	1	2.23333	1	2.86667
1	1	1	1	54.263	1	3	2a	4A	1	0	1	1	0	0	73.4333	0	73.4333
1	1	1	1	34.6548	0	4a	2a	4A	1	0	0	0	0	0	72.2333	0	72.2333
1	1	1	1	35.7342	0	2	2b	4A	1	0	1	1	0	1	57.7	1	57.7
1	1	1	1	37.8219	0	1	2b	4A	2	0	1	1	0	1	13.3	1	14.8
1	1	1	1	38.2438	0	2	2b	4A	2	0	1	1	0	0	69.4333	0	69.4333
1	1	1	1	39.6384	0	4b	2b	4B	1	0	1	1	0	1	2.33333	1	5.33333
1	0	0	1	41.0877	0	4a	2b	4A	3	1	1	1	1	1	7.16667	1	7.4
1	1	1	1	41.6192	0	4a	2b	4A	2	1	1	1	0	1	10.9333	1	11.7
1	1	1	1	44.0904	1	2	2b	4A	1	1	0	1	0	1	27.0667	1	27.0667
1	1	1	1	44.2301	0	4a	2b	4A	2	0	1	0	1	0	88.2667	0	88.2667
1	0	1	1	44.3315	0	4b	2b	4B	2	0	1	1	0	1	3.3	1	8.5
1	1	0	1	47.8082	0	4a	2b	4A	1	0	1	1	0	1	2.2	1	7.76667
1	1	1	0	48.4712	0	1	2b	4A	3	0	1	1	0	1	2.76667	1	6.66667
1	1	0	1	48.9863	0	4a	2b	4A	1	1	1	0	1	1	2.56667	1	8.96667
1	1	0	0	50.1452	1	4a	2b	4A	2	0	0	0	0	0	107.733	0	107.733
1	1	1	1	50.9425	0	4a	2b	4A	1	0	1	1	0	0	71.2667	0	71.2667
1	1	1	1	51.1014	1	4a	2b	4A	1	1	1	1	0	0	102	0	102
1	1	1	1	52.6877	0	4a	2b	4A	1	0	0	0	1	1	13.2	1	13.2
1	1	1	1	53.5068	0	4a	2b	4A	3	0	1	1	0	1	3.8	1	10.6333
1	1	1	1	57.0767	0	4a	2b	4A	1	0	1	1	0	0	99.1333	0	99.1333
1	1	1	1	57.1945	1	1	2b	4A	1	1	1	1	1	1	2.93333	1	2.93333
1	1	1	1	58.5808	0	4a	2b	4A	3	0	1	1	0	1	3.5	1	4.06667
1	1	1	1	59.3315	0	2	2b	4A	2	0	1	0	0	0	103.2	0	103.2
1	1	1	0	63.1836	0	3	2b	4A	1	1	0	0	0	1	7.73333	1	7.73333
1	0	0	1	63.8767	0	4a	2b	4A	1	0	0	0	0	1	3.1	1	5.86667
1	1	1	1	64.3671	1	2	2b	4A	2	0	1	0	0	1	5.03333	1	16.4333
1	1	1	1	64.3699	0	4a	2b	4A	1	0	1	1	1	1	12.7333	1	12.7333
1	0	1	1	71.8247	0	4a	2b	4A	2	1	1	1	0	1	0.966667	1	0.966667
1	0	1	1	48.337	0	2	2b	4A	1	0	1	1	1	1	14	1	14.3333
1	1	1	1	50.6384	1	2	2b	4A	2	0	1	1	0	1	7.4	1	7.7
1	1	1	1	34.5096	0	3	2c	4A	1	1	1	1	0	0	93.5333	0	93.5333
1	1	1	1	38.2904	1	4a	2c	4A	1	0	1	1	0	1	7.86667	1	15.4667
1	1	1	1	44.926	1	4a	2c	4A	2	1	1	1	0	1	1.23333	1	1.23333
1	1	1	1	46.6274	0	4b	2c	4A	2	1	1	1	0	1	3.06667	1	3.06667
1	1	0	1	53.0247	0	4a	2c	4A	2	1	1	1	0	1	1.06667	1	2.26667
1	1	1	1	54.2685	1	4a	2c	4A	1	0	1	1	0	1	7.73333	1	7.73333
1	0	0	1	57.2658	1	1	2c	4A	2	1	0	0	0	1	45.9333	1	52.1333
1	1	0	1	58.4384	0	4b	2c	4B	3	0	1	1	1	1	1.53333	1	1.53333
1	1	1	1	68.8356	0	4a	2c	4A	2	0	1	0	0	1	32.2667	1	32.2667
1	1	1	1	44.7315	1	2	3	4B	2	0	0	1	1	1	82.2333	1	82.2333
1	1	1	1	57.3014	0	2	3	4B	2	0	1	0	0	1	3.46667	1	6.03333
2	0	1	0	63.4082	0	4a	3	4B	1	1	1	1	0	1	2.6	1	4.13333
2	0	0	0	26.2822	1	2	0	2	1	0	0	0	0	0	95.5333	0	95.5333
1	1	1	1	43.1397	1	4a	0	4A	2	0	1	0	0	1	11.3667	1	30.6667
1	1	1	1	46.5233	1	2	0	2	2	0	1	0	0	0	76.4	0	76.4
1	1	0	1	47.9342	1	1	0	1	1	0	0	0	1	1	12.8333	1	17.9667
1	1	1	1	52.7534	0	1	0	1	1	0	0	0	0	1	6.56667	1	14.0333
1	0	1	0	53.1068	1	1	0	1	1	0	0	0	1	0	109.333	0	109.333
1	1	0	1	53.5836	1	1	0	1	1	0	0	0	0	0	72	0	72
1	1	1	1	55.7041	1	2	0	2	1	0	0	0	0	1	41.1667	1	41.1667
1	1	1	1	56.0521	1	1	0	1	1	0	0	0	0	0	70.2	0	70.2
2	0	0	0	56.3233	0	1	0	1	1	0	0	0	0	0	78.1667	0	78.1667
1	1	1	1	56.3507	0	2	0	2	1	0	0	0	0	1	6.06667	1	45.5333
1	1	1	1	57.6685	1	1	0	1	1	0	0	0	0	1	22.7333	1	22.7333
1	1	1	1	60.6247	1	1	0	1	2	1	0	0	0	1	12.8667	1	13.6667
1	1	1	1	62.1589	0	2	0	2	2	0	0	0	0	1	6.4	1	6.4
1	1	0	1	66.0164	1	1	0	1	1	0	0	0	0	1	19.1333	0	101.633
1	1	0	1	66.7452	0	1	0	1	1	0	0	0	0	1	20.5667	1	20.5667
1	1	1	1	60.7562	1	1	0	1	1	0	0	0	0	1	8.96667	1	8.96667
